# Supplementary material for: An Amperometric Biomedical Sensor for the Determination of Homocysteine Using Gold Nanoparticles and Acetylene Black-Dihexadecyl Phosphate-Modified Glassy Carbon Electrode
Source: MDPI journal article supplement (doi:10.3390/mi14010198), 2023-01-13
Supplement: s1 [file s1]

## Supporting Information

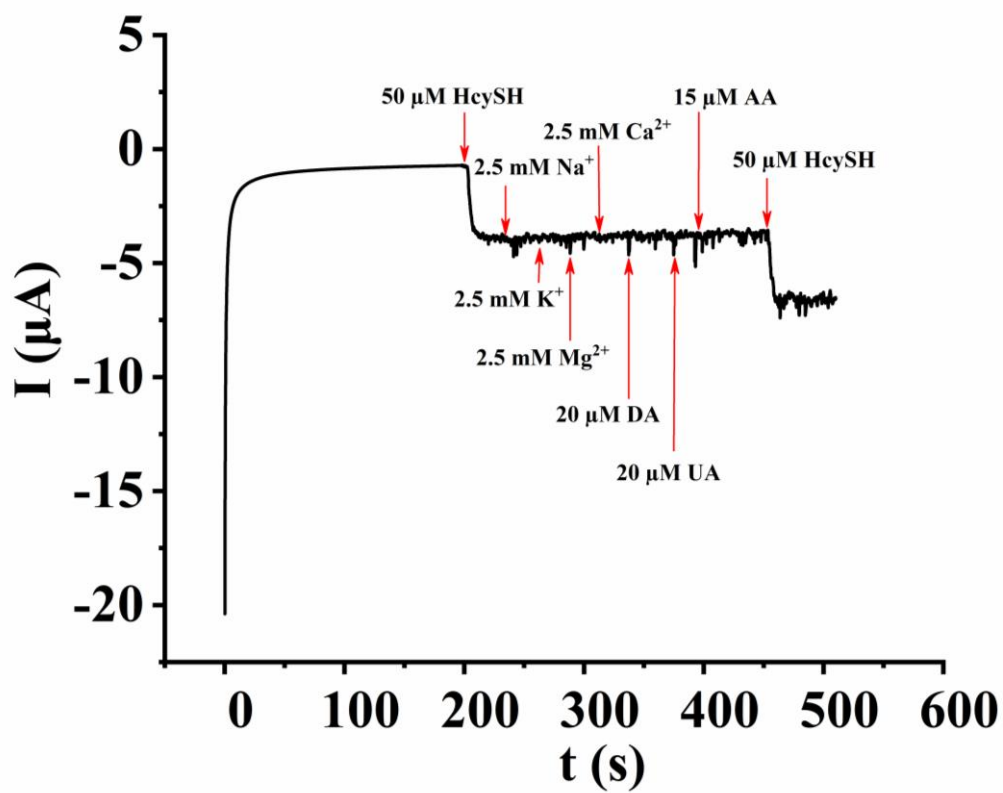

**Figure S1.** Amperometric response of 50  $\mu\text{M}$  HcySH and other possible coexisting interferents on AuNPs/AB-DHP/GCE in 0.15 M PBS (pH = 6.0) with the operation potential of 0.6 V.

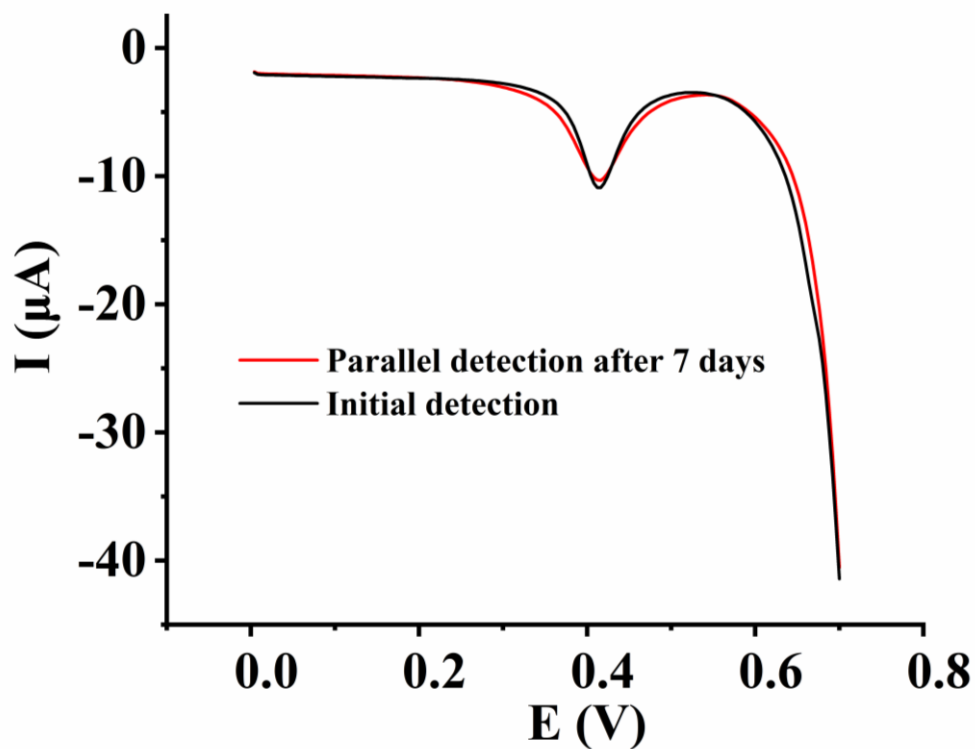

**Figure S2.** Differential pulse voltammograms of 200  $\mu\text{M}$  HcySH on AuNPs/AB-DHP/GCE in 0.15 M PBS (pH = 6.0) at different time.

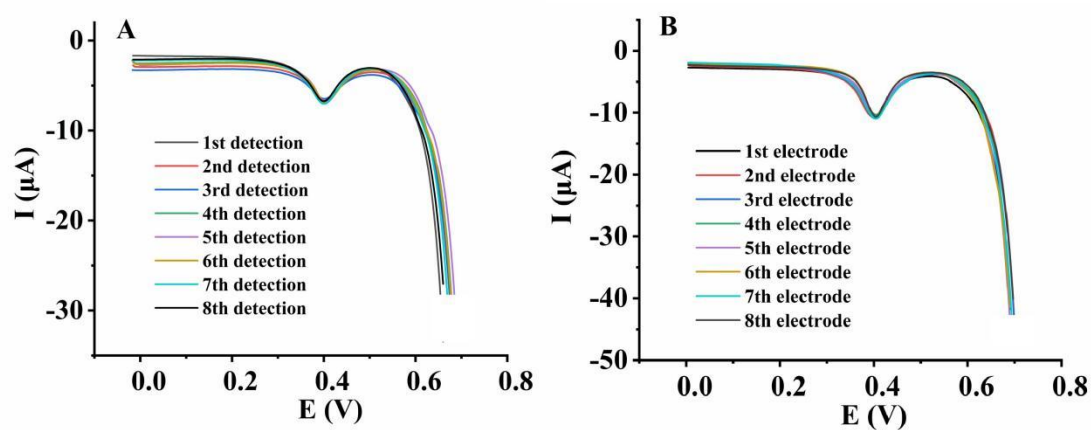

**Figure S3.** Differential pulse voltammograms of 200  $\mu\text{M}$  HcySH on AuNPs/AB-DHP/GCE in 0.15 M PBS (pH = 6.0). (A) Parallel detection with one AuNPs/AB-DHP/GCE for eight times. (B) Parallel detection with eight different AuNPs/AB-DHP/GCEs.

**Table S1.** Results of the recovery experiment.

| Human blood<br>serum | Added ( $\mu\text{M}$ ) | Found ( $\mu\text{M}$ ) | Recovery (%) |
|----------------------|-------------------------|-------------------------|--------------|
| Sample 1             | 50                      | 47.3                    | 94.5         |
| Sample 2             | 50                      | 51.9                    | 103.9        |
| Sample 3             | 50                      | 46.7                    | 93.4         |
| Sample 4             | 100                     | 92.9                    | 92.9         |
| Sample 5             | 100                     | 107.6                   | 107.6        |
| Sample 6             | 100                     | 97.3                    | 97.3         |
